# Supplementary material
Source: publisher site journal article supplement (https://www.dovepress.com/article/242193)
Supplement: Supplementary file 1 [file get_supplementary_file.php]

Supplementary table 1. To investigate the risk factors for the pathological outcomes of prostate cancer by univariable logistic regression analyses

|                | Prostatectomy GS<br>(≥8 vs ≤7) |         | Pathological stage<br>(pT3-4 vs pT2) |         | Seminal vesicle invasion<br>(Yes vs No) |         | LN involvement<br>(Yes vs No) |         | Extracapsular extension<br>(Yes vs No) |         | Surgical margin<br>(Yes vs No) |         |
|----------------|--------------------------------|---------|--------------------------------------|---------|-----------------------------------------|---------|-------------------------------|---------|----------------------------------------|---------|--------------------------------|---------|
|                | OR (95% CI)                    | P value | OR (95% CI)                          | P value | OR (95% CI)                             | P value | OR (95% CI)                   | P value | OR (95% CI)                            | P value | OR (95% CI)                    | P value |
| PSA (ng/ml)    |                                |         |                                      |         |                                         |         |                               |         |                                        |         |                                |         |
| < 10           | 1                              | < 0.001 | 1                                    | < 0.001 | 1                                       | < 0.001 | 1                             | < 0.001 | 1                                      | < 0.001 | 1                              | < 0.001 |
| 10≤PSA < 20    | 1.714(1.155-2.542)             | 0.007   | 2.398(1.654-3.477)                   | < 0.001 | 3.469(2.046-5.883)                      | < 0.001 | 1.265(0.572-2.798)            | 0.562   | 1.903(1.263-2.866)                     | 0.002   | 5.730(2.862-11.474)            | < 0.001 |
| ≥20            | 4.116(2.852-5.939)             | < 0.001 | 5.476(3.833-7.824)                   | < 0.001 | 8.538(5.185-14.06)                      | < 0.001 | 5.74(2.975-11.074)            | < 0.001 | 3.529(2.403-5.182)                     | < 0.001 | 9.456(4.827-18.527)            | < 0.001 |
| Biopsy GS      |                                |         |                                      |         |                                         |         |                               |         |                                        |         |                                |         |
| ≤6             | 1                              | < 0.001 | 1                                    | < 0.001 | 1                                       | < 0.001 | 1                             | 0.090   | 1                                      | < 0.001 |                                | < 0.001 |
| 7              | 2.534(1.520-4.224)             | < 0.001 | 2.572(1.801-3.673)                   | < 0.001 | 2.445(1.565-3.822)                      | < 0.001 | 1.199(0.917-2.659)            | 0.141   | 3.289(2.178-4.966)                     | < 0.001 | 2.267(1.388-3.703)             | 0.001   |
| ≥8             | 25.2(15.597-40.716)            | < 0.001 | 5.804(4.071-8.274)                   | < 0.001 | 5.334(3.480-8.176)                      | < 0.001 | 1.740(0.818-3.003)            | 0.070   | 4.478(2.977-6.735)                     | < 0.001 | 3.258(2.022-5.250)             | < 0.001 |
| Clinical stage |                                |         |                                      |         |                                         |         |                               |         |                                        |         |                                |         |
| ≤cT2a          | 1                              | 0.001   |                                      | 0.008   |                                         | < 0.001 |                               | 0.041   |                                        | 0.067   |                                | 0.001   |
| cT2b           | 1.141(0.815-1.597)             | 0.441   | 1.225(0.897-1.673)                   | 0.202   | 1.642(1.140-2.365)                      | 0.008   | 0.840(0.476-1.482)            | 0.548   | 1.118(0.791-1.581)                     | 0.528   | 1.448(0.943-2.223)             | 0.091   |
| ≥cT2c          | 1.861(1.348-2.570)             | < 0.001 | 1.629(1.196-2.220)                   | 0.002   | 2.148(1.505-3.066)                      | < 0.001 | 1.655(1.020-2.686)            | 0.041   | 1.486(1.062-2.081)                     | 0.021   | 2.125(1.418-3.185)             | < 0.001 |

GS: Gleason score; LN: lymph node; PSA: prostate-specific antigen; OR: odd ratio; CI: confidence interval.
